# Supplementary material
Source: bioRxiv or medRxiv preprint supplement (https://www.biorxiv.org/highwire/filestream/340/field_highwire_adjunct_files/2/000802-3.pdf)

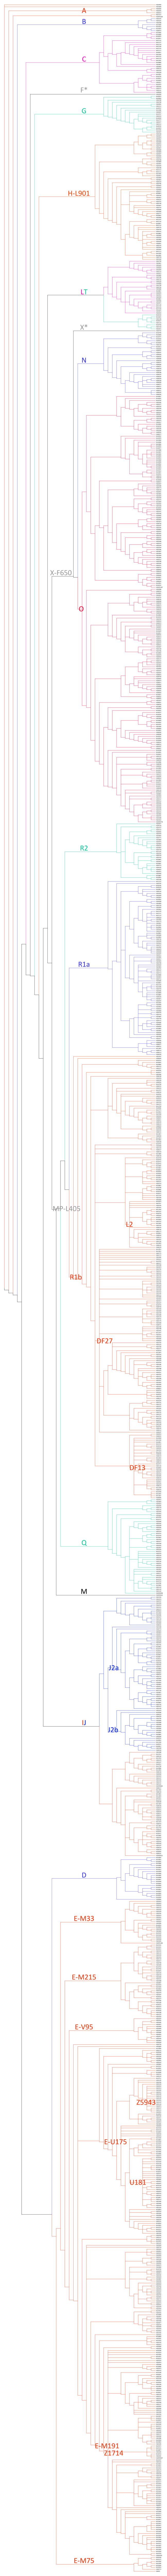

Supplement: Supplementary file [file 000802-3.pdf]
